# Supplementary material for: HPLC-ESI-MS/MS validation and pharmacokinetics of kalopanaxsaponin A in rats
Source: Royal Society of Chemistry journal article supplement (doi:10.1039/c4ra14264k), 2014-12-19
Supplement: c4ra14264k1.pdf [file c4ra14264k1.pdf]

**Supplementary materials**

**Supplementary Figure 1.  $^1\text{H}$ -NMR spectrum of KPS-A (solvent:  $\text{DMSO-d}_6$ )**

**Supplementary Figure 2.  $^{13}\text{C}$ -NMR spectrum of KPS-A (solvent:  $\text{DMSO-d}_6$ )**

**Supplementary Figure 3.  $\text{MS}^2$  spectrum of KPS-A (concentration in methanol:  $1 \text{ mg mL}^{-1}$ )**

**Supplementary Figure 4. Purity report of KPS-A by HPLC-DAD (Column: Kromasil 100-5  $\text{C}_{18}$  column ( $250 \text{ mm} \times 4.6 \text{ mm}$ ,  $5 \mu\text{m}$ ), mobile phase: acetonitrile-0.1% phosphoric acid (50:50, v/v), wavelength: 210 nm)**

Supplementary Figure 1. <sup>1</sup>H-NMR spectrum of KPS-A (solvent: DMSO-d<sub>6</sub>)

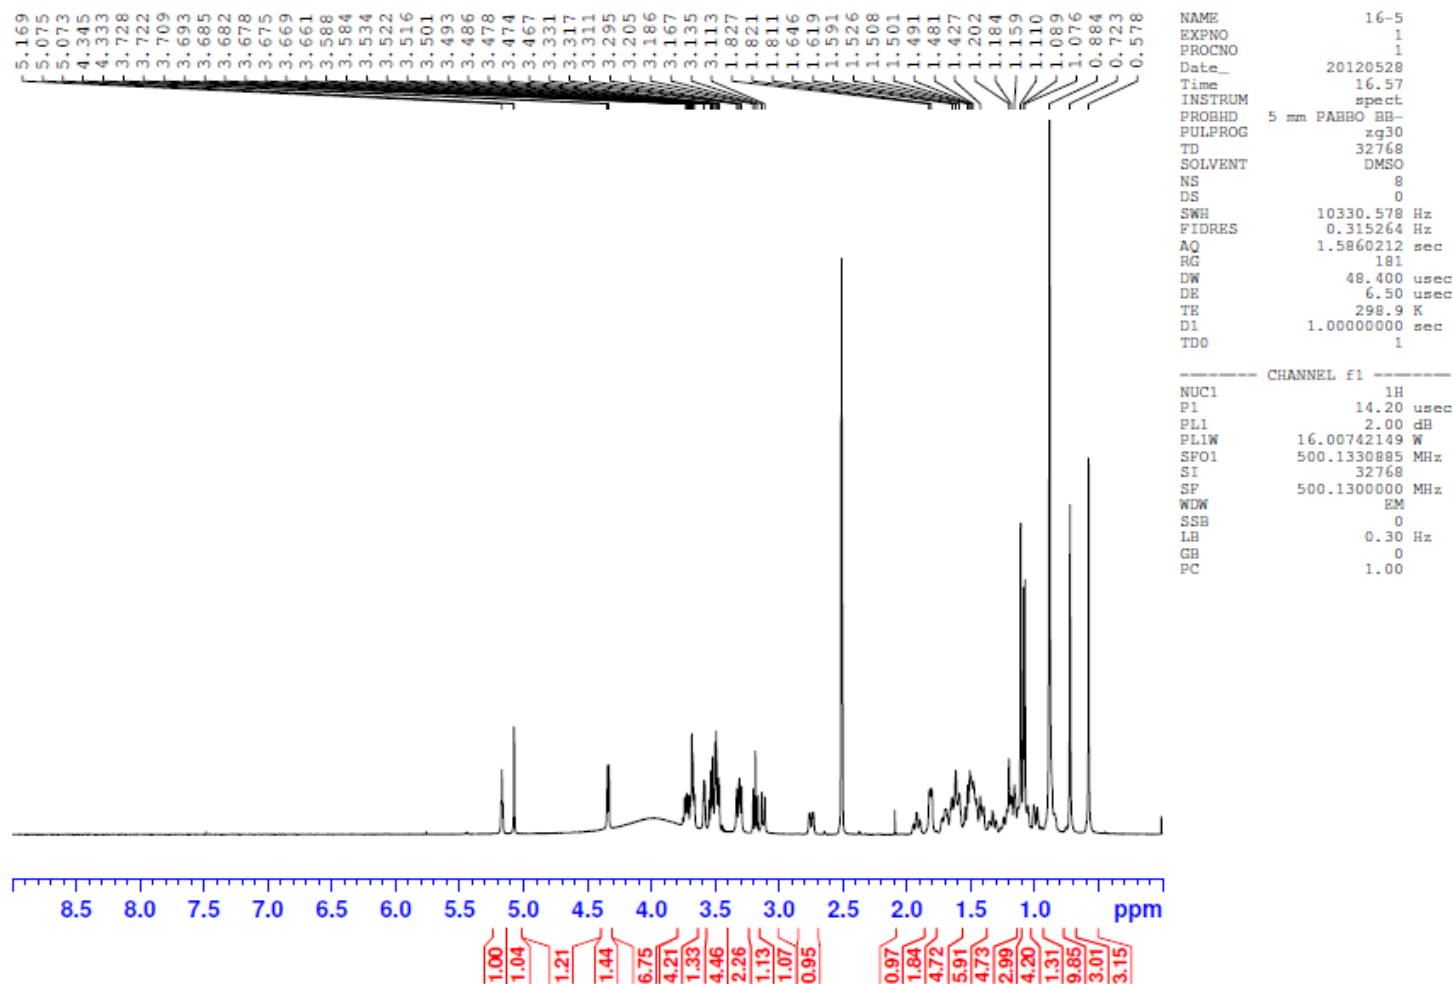

Supplementary Figure 2. <sup>13</sup>C-NMR spectrum of KPS-A (solvent: DMSO-d<sub>6</sub>)

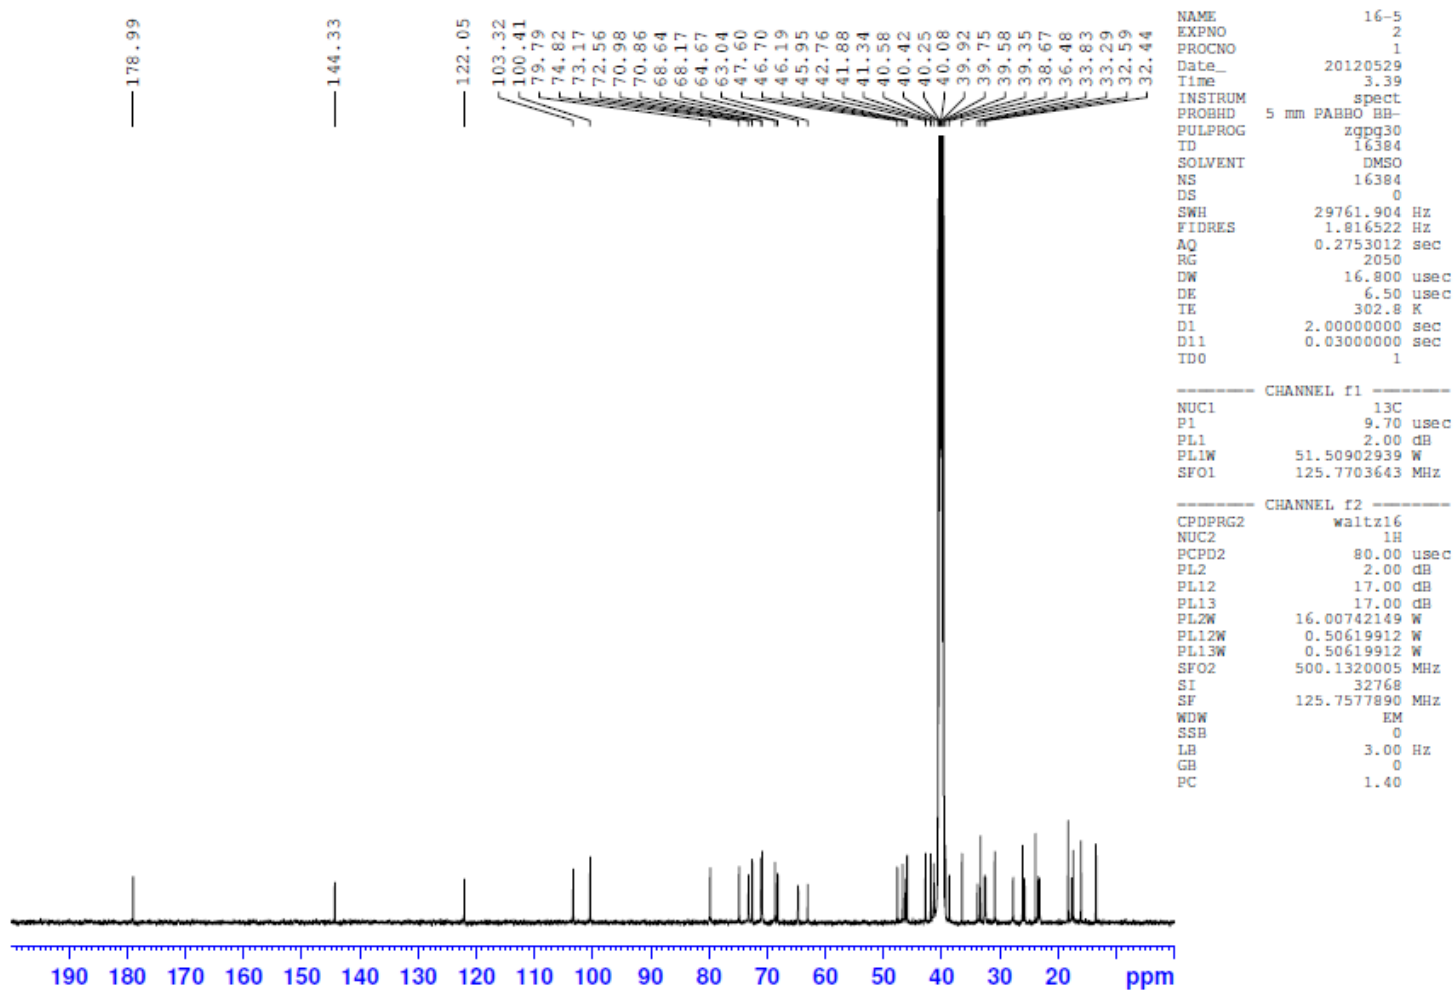

**Supplementary Figure 3. MS<sup>2</sup> spectrum of KPS-A (concentration in methanol: 1 mg mL<sup>-1</sup>)**

T: FTMS - c ESI d Full ms2 749.45@cid35.00 [195.00-760.00]

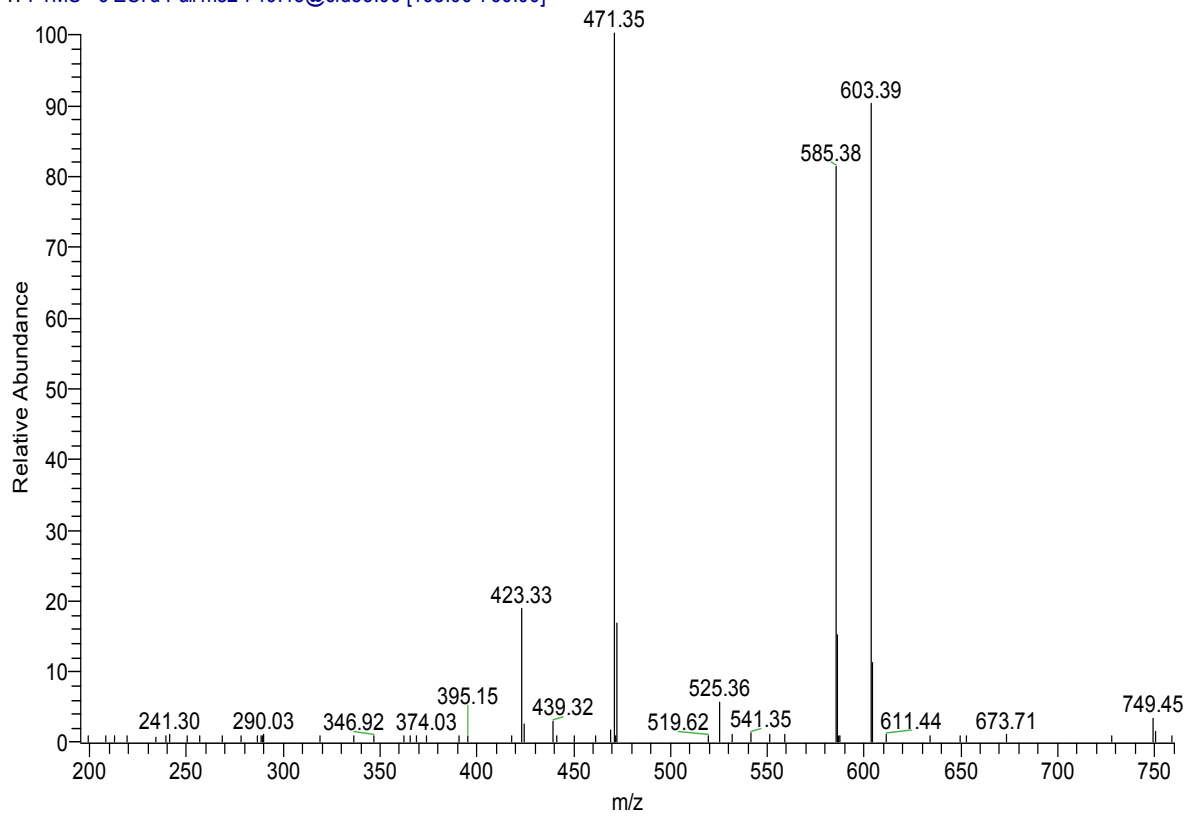

**Supplementary Figure 4. Purity report of KPS-A by HPLC-DAD (Column: Kromasil 100-5 C<sub>18</sub> column (250 mm × 4.6 mm, 5 μm), mobile phase: acetonitrile-0.1% phosphoric acid (50:50, v/v), wavelength: 210 nm)**

**==== Shimadzu LCsolution Report ====**

Operator : Admin  
 Sample : KPS-A  
 ID :  
 Tray # : 1  
 Vial # : 16  
 Inj. Volume uL : 5 uL  
 Data Name : KPS-A\_50% acetonitrile 15min\_2014-12-8\_2.lcd  
 Method Name : 50% acetonitrile 15min.lcm  
 Batch Name : SPE.lcb  
 Report Name : Default.lcr  
 Acquisition Date Time : 2014-12-8 13:27:31  
 Modified Date Time : 2014-12-8 15:25:44

<Chromatogram>

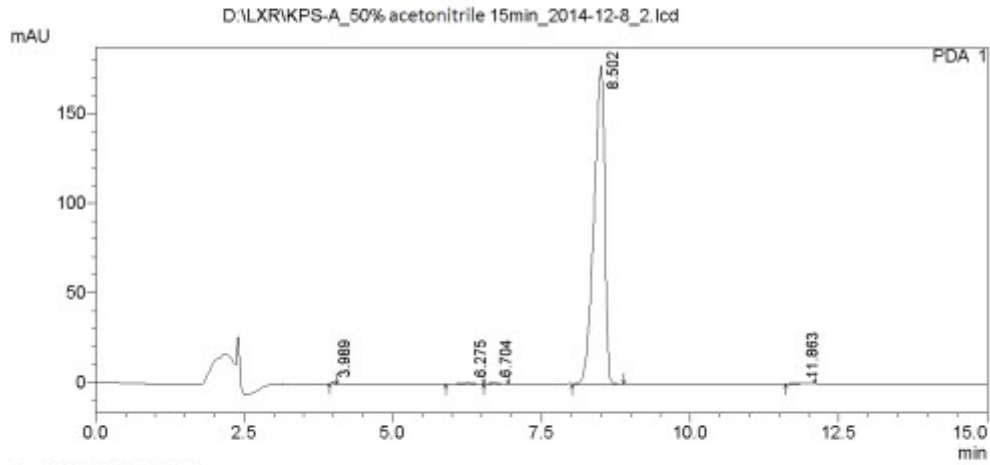

1 PDA 1/210nm 4nm

| Peak# | Retention Time | Area    | Height | Area %  | Height % |
|-------|----------------|---------|--------|---------|----------|
| 1     | 3.989          | 2180    | 491    | 0.096   | 0.273    |
| 2     | 6.275          | 9866    | 659    | 0.435   | 0.367    |
| 3     | 6.704          | 7185    | 729    | 0.316   | 0.406    |
| 4     | 8.502          | 2245947 | 177441 | 98.922  | 98.747   |
| 5     | 11.863         | 5248    | 372    | 0.231   | 0.207    |
| Total |                | 2270427 | 179691 | 100.000 | 100.000  |
